# Supplementary material for: Epimural Indicator Phylotypes of Transiently-Induced Subacute Ruminal Acidosis in Dairy Cattle
Source: PubMed Central journal article supplement (PMC4777738; doi:10.3389/fmicb.2016.00274), 2016-03-04
Supplement: Table4.pdf [file Table4.pdf]

1 **Table S4. Table showing the 50 most abundant OTUs, the number of sequences, their**  
2 **relative abundance and their respective best NCBI BLASTn hit including the habitat of**  
3 **the best uncultured NCBI BLASTn hit.**

4

| OTU | No. of sequences | Relative abundance median [%] | Taxonomy NCBI BLAST cultured                               | Similarity [%] | Taxonomy NCBI BLAST uncultured                                             | Similarity [%] | Habitat of best uncultured NCBI BLAST hit                                                       |
|-----|------------------|-------------------------------|------------------------------------------------------------|----------------|----------------------------------------------------------------------------|----------------|-------------------------------------------------------------------------------------------------|
| 1   | 175683           | 16.49                         | <i>Campylobacter fetus</i> ; KF052122.1                    | 98             | Uncultured rumen bacterium; LN613062.1                                     | 97             | goat rumen mucosa                                                                               |
| 2   | 75116            | 7.05                          | <i>Kingella oralis</i> ; KM225757.1                        | 95             | Uncultured rumen bacterium clone; HQ400365.1                               | 99             | rumen tissue from HEAN (Hereford x Angus) crossbred beef cattle                                 |
| 3   | 48922            | 4.59                          | <i>Brachymonas denitrificans</i> ; EU434449.1              | 96             | Uncultured rumen bacterium clone; LN613041.1                               | 99             | goat rumen mucosa                                                                               |
| 4   | 30179            | 2.83                          | <i>Desulfohalobus</i> sp. oral taxon; GU398208.1           | 96             | Uncultured rumen bacterium clone; GU304430.1                               | 99             | rumen epithelium Bos taurus Hereford x Angus hybrid (HEAN)                                      |
| 5   | 17000            | 1.60                          | <i>Azoarcus</i> sp.; AP012304.1                            | 94             | Uncultured bacterium; AB456263.1                                           | 95             | activated sludge                                                                                |
| 6   | 13579            | 1.27                          | <i>Bacteroidetes</i> bacterium; AY548787.1                 | 90             | Uncultured <i>Bacteroidetes/Chlorobi</i> group bacterium clone; EU266837.1 | 93             | tar-oil contaminated aquifer sediments                                                          |
| 7   | 17416            | 1.63                          | <i>Desulfohalobus</i> sp. oral taxon; GU398207.1           | 97             | Uncultured bacterium clone; EU844167.1                                     | 99             | bovine rumen fluid fiber adherent microbiome from steer 64; 6 week sample; 1 hour after feeding |
| 8   | 17786            | 1.67                          | <i>Bacteroidia</i> bacterium feline oral taxon; KM462114.1 | 90             | Uncultured bacterium clone; EU773657.1                                     | 99             | Capybara feces                                                                                  |
| 9   | 17000            | 1.60                          | <i>Ruminobacter</i> sp.; AB730720.1                        | 96             | Uncultured rumen bacterium; AB615192.1                                     | 100            | cattle rumen                                                                                    |
| 10  | 9875             | 0.93                          | <i>Clostridium oceanicum</i> ; LC007108.1                  | 90             | Uncultured rumen bacterium; LN612980.1                                     | 99             | goat rumen mucosa                                                                               |
| 11  | 11045            | 1.04                          | <i>Desulfovibrio</i> sp. feline oral taxon; KM461955.1     | 97             | Uncultured bacterium; HE681397.1                                           | 97             | human subgingival plaque                                                                        |
| 12  | 10107            | 0.95                          | <i>Desulfohalobus</i> sp. oral taxon; GU398208.1           | 96             | Uncultured rumen bacterium; LN612946.1                                     | 98             | goat rumen mucosa                                                                               |
| 13  | 9159             | 0.86                          | Methanogenic prokaryote enrichment culture; KC821455.1     | 91             | Uncultured rumen bacterium clone; GU303307.1                               | 99             | rumen epithelium Bos taurus Hereford x Angus hybrid (HEAN)                                      |
| 14  | 7634             | 0.72                          | <i>Cardiobacterium</i> sp. canine oral taxon; JN713405.1   | 91             | uncultured rumen bacterium; AM884040.1                                     | 99             | rumen epithelium of wethers                                                                     |

|    |      |      |                                                              |    |                                              |     |                                                                                          |
|----|------|------|--------------------------------------------------------------|----|----------------------------------------------|-----|------------------------------------------------------------------------------------------|
| 15 | 5870 | 0.55 | <i>Bacteroidetes</i> bacterium; AY548787.1                   | 90 | Uncultured bacterium isolate; HQ222748.1     | 93  | hybrid wastewater stabilization pond treating domestic wastewater                        |
| 16 | 8021 | 0.75 | <i>Bacteroidia</i> bacterium feline oral taxon; KM462114.1   | 91 | Uncultured rumen bacterium clone; EU719248.1 | 98  | rumen Bos taurus breed Holstein                                                          |
| 17 | 7903 | 0.74 | <i>Succiniclasicum ruminis</i> ; NR_026205.1                 | 96 | Uncultured rumen bacterium; AB612616.1       | 99  | cattle rumen                                                                             |
| 18 | 8838 | 0.83 | <i>Gilliamella apicola</i> ; KF600145.1                      | 85 | Uncultured rumen bacterium clone; GU303441.1 | 99  | rumen epithelium Bos taurus Hereford x Angus hybrid (HEAN)                               |
| 19 | 7936 | 0.74 | <i>Enterobacteriaceae</i> bacterium; KF600324.1              | 86 | Uncultured bacterium; AB506532.1             | 100 | sheep rumen                                                                              |
| 20 | 5027 | 0.47 | GN02 bacterium canine oral taxon; JN713535.1                 | 93 | Uncultured rumen bacterium; LN612908.1       | 99  | goat rumen mucosa                                                                        |
| 21 | 6172 | 0.58 | <i>Bacteroidia</i> bacterium feline oral taxon; KM462114.1   | 90 | Uncultured rumen bacterium clone; GQ326919.1 | 98  | rumen of cows                                                                            |
| 22 | 6439 | 0.60 | <i>Synergistales</i> bacterium canine oral taxon; JN713408.1 | 96 | uncultured rumen bacterium clone; GU304562.1 | 99  | rumen epithelium Bos taurus Hereford x Angus hybrid (HEAN)                               |
| 23 | 6774 | 0.64 | <i>Ruminobacter</i> sp.; AB730720.1                          | 98 | Uncultured rumen bacterium; AB555288.1       | 98  | cattle rumen                                                                             |
| 24 | 4532 | 0.43 | <i>Endomicrobium proavitum</i> ; CP009498.1                  | 93 | Uncultured rumen bacterium; AB614890.1       | 99  | cattle rumen                                                                             |
| 25 | 5950 | 0.56 | Rumen bacterium; GU324404.1                                  | 99 | Uncultured rumen bacterium; LN612775.1       | 99  | goat rumen mucosa                                                                        |
| 26 | 4926 | 0.46 | <i>Desulfovibrio</i> sp. oral taxon; GU398181.1              | 96 | Uncultured organism clone; HQ787847.1        | 96  | gastrointestinal specimens Homo sapiens                                                  |
| 27 | 5562 | 0.52 | <i>Ruminobacter</i> sp.; AB730720.1                          | 98 | Uncultured rumen bacterium; AB614659.1       | 99  | cattle rumen                                                                             |
| 28 | 3807 | 0.36 | <i>Clostridium oceanicum</i> ; LC007108.1                    | 91 | uncultured rumen bacterium clone; GQ327200.1 | 99  | rumen of cows                                                                            |
| 29 | 3996 | 0.38 | <i>Pyramidobacter piscolens</i> ; NR_113185.1                | 94 | uncultured rumen bacterium clone; JF797534.1 | 99  | rumen dairy cattle (Holstein)                                                            |
| 30 | 4884 | 0.46 | <i>Bacteroidetes</i> bacterium oral taxon; GU413618.1        | 88 | Uncultured bacterium; AB507597.1             | 98  | sheep rumen                                                                              |
| 31 | 2280 | 0.21 | <i>Saccharofermentans</i> sp.; AB730782.1                    | 99 | Uncultured bacterium clone; EU844212.1       | 99  | rumen fluid fiber adherent microbiome from steer 64; 6 week sample; 1 hour after feeding |

|    |      |      |                                                                    |     |                                                               |    |                                                                     |
|----|------|------|--------------------------------------------------------------------|-----|---------------------------------------------------------------|----|---------------------------------------------------------------------|
| 32 | 4225 | 0.40 | <i>Bacteroidales</i><br>bacterium;<br>AB730712.1                   | 87  | Uncultured rumen<br>bacterium;<br>AB555059.1                  | 99 | cattle rumen                                                        |
| 33 | 3723 | 0.35 | <i>Endomicrobium</i><br><i>proavitum</i> ;<br>CP009498.1           | 94  | Uncultured rumen<br>bacterium;<br>AB612798.1                  | 99 | cattle rumen                                                        |
| 34 | 2634 | 0.25 | <i>Bacteroidetes</i><br>bacterium;<br>AB849455.1                   | 97  | uncultured rumen<br>bacterium clone;<br>GQ327735.1            | 99 | rumen of cows                                                       |
| 35 | 2911 | 0.27 | <i>Clostridium</i><br><i>oceanicum</i> ;<br>LC007108.1             | 91  | Uncultured rumen<br>bacterium clone;<br>GQ327200.1            | 99 | rumen of cows                                                       |
| 36 | 3307 | 0.31 | <i>Clostridiales</i><br>bacterium;<br>AB730671.1                   | 94  | Uncultured rumen<br>bacterium clone;<br>GU303900.1            | 99 | rumen contents Bos<br>taurus Hereford x<br>Angus hybrid<br>(HEAN)   |
| 37 | 3650 | 0.34 | <i>Fretibacterium</i> sp.<br>feline oral taxon;<br>KM462182.1      | 95  | Uncultured rumen<br>bacterium clone;<br>GU304528.1            | 99 | rumen epithelium<br>Bos taurus<br>Hereford x Angus<br>hybrid (HEAN) |
| 38 | 3137 | 0.29 | <i>Christensenella</i><br><i>minuta</i> ; NR_112900.1              | 90  | Uncultured rumen<br>bacterium clone;<br>GU303307.1            | 99 | rumen epithelium<br>Bos taurus<br>Hereford x Angus<br>hybrid (HEAN) |
| 39 | 3113 | 0.29 | <i>Deltaproteobacterium</i> ;<br>AY771935.1                        | 95  | Uncultured bacterium<br>clone; JX097311.1                     | 95 | German Wadden<br>Sea tidal flat<br>sediments                        |
| 40 | 3028 | 0.28 | <i>Bacteroidia</i> bacterium<br>feline oral taxon;<br>KM462114.1   | 91  | Uncultured rumen<br>bacterium;<br>AB616493.1                  | 95 | cattle rumen                                                        |
| 41 | 2877 | 0.27 | <i>Elusimicrobium</i><br><i>minutum</i> ;<br>NR_074114.1           | 96  | Uncultured <i>Termite</i><br>group 1 bacterium;<br>AM491075.1 | 99 | Cow Rumen                                                           |
| 42 | 2259 | 0.21 | <i>Clostridiales</i><br>bacterium canine oral<br>taxon; JN713385.1 | 94  | Uncultured rumen<br>bacterium;<br>AB185640.1                  | 99 | PCR-derived<br>sequence from<br>cattle rumen                        |
| 43 | 3561 | 0.33 | <i>Clostridiales</i><br>bacterium;<br>AB730671.1                   | 94  | uncultured rumen<br>bacterium clone;<br>GU303900.1            | 99 | sheep rumen                                                         |
| 44 | 3302 | 0.31 | <i>Succinivibrio</i><br><i>dextrinosolvens</i> ;<br>AB849337.1     | 99  | Uncultured<br><i>Succinivibrio</i> sp.<br>clone; KM073420.1   | 99 | rumen Budorcas<br>taxicolor bedfordi                                |
| 45 | 3434 | 0.32 | <i>Succinivibrio</i><br><i>dextrinosolvens</i> ;<br>AB849337.1     | 96  | uncultured bacterium;<br>AB821776.1                           | 99 | cattle rumen                                                        |
| 46 | 2827 | 0.27 | <i>Bacteroidia</i> bacterium<br>feline oral taxon;<br>KM462114.1   | 90  | uncultured bacterium;<br>AB746546.1                           | 96 | cattle rumen                                                        |
| 47 | 2867 | 0.27 | <i>Clostridiales</i><br>bacterium feline oral<br>taxon; KM462113.1 | 95  | uncultured bacterium;<br>KM073392.1                           | 98 | rumen Budorcas<br>taxicolor bedfordi                                |
| 48 | 2934 | 0.28 | <i>Clostridium</i> from<br>anoxic bulk soil;<br>AJ229251.1         | 100 | uncultured rumen<br>bacterium clone;<br>JX218666.1            | 99 | cattle rumen                                                        |

|    |      |      |                                                                        |    |                                              |    |              |
|----|------|------|------------------------------------------------------------------------|----|----------------------------------------------|----|--------------|
| 49 | 3141 | 0.29 | <i>Selenomonas ruminantium</i> subsp. <i>lactilytica</i> ; NR_075026.1 | 99 | uncultured rumen bacterium clone; AB555463.1 | 99 | cattle rumen |
| 50 | 3132 | 0.29 | <i>Bacteroidia</i> bacterium feline oral taxon; KM462114.1             | 91 | Uncultured rumen bacterium; AB612732.1       | 96 | cattle rumen |

---

5
